# Supplementary material for: Room temperature synthesis of Sn2+doped highly luminescent CsPbBr3quantum dots for high CRI white light-emitting diodes
Source: Royal Society of Chemistry journal article supplement (doi:10.1039/d1nr01492g), 2021-01-01
Supplement: d1nr01492g1.pdf [file d1nr01492g1.pdf]

## Room temperature synthesis of Sn<sup>2+</sup> doped highly luminescent CsPbBr<sub>3</sub> quantum dots for high CRI white light-emitting diodes

Dongdong Yan, Qionghua Mo, Shuangyi Zhao, Wensi Cai\*, Zhigang Zang\*

Key Laboratory of Optoelectronic Technology & Systems (Ministry of Education), Chongqing University, Chongqing, 400044, China

\* [wensi.cai@cqu.edu.cn](mailto:wensi.cai@cqu.edu.cn); [zangzg@cqu.edu.cn](mailto:zangzg@cqu.edu.cn)

Table S1 The amount of the PbBr<sub>2</sub> and the SnBr<sub>2</sub>.

| PbBr <sub>2</sub> (mmol) | SnBr <sub>2</sub> (mmol) | Ratio (%) |
|--------------------------|--------------------------|-----------|
| 0.105                    | 0                        | 0         |
| 0.0945                   | 0.0105                   | 10        |
| 0.084                    | 0.021                    | 20        |
| 0.0735                   | 0.0315                   | 30        |
| 0.063                    | 0.042                    | 40        |
| 0.0525                   | 0.0525                   | 50        |
| 0.042                    | 0.063                    | 60        |

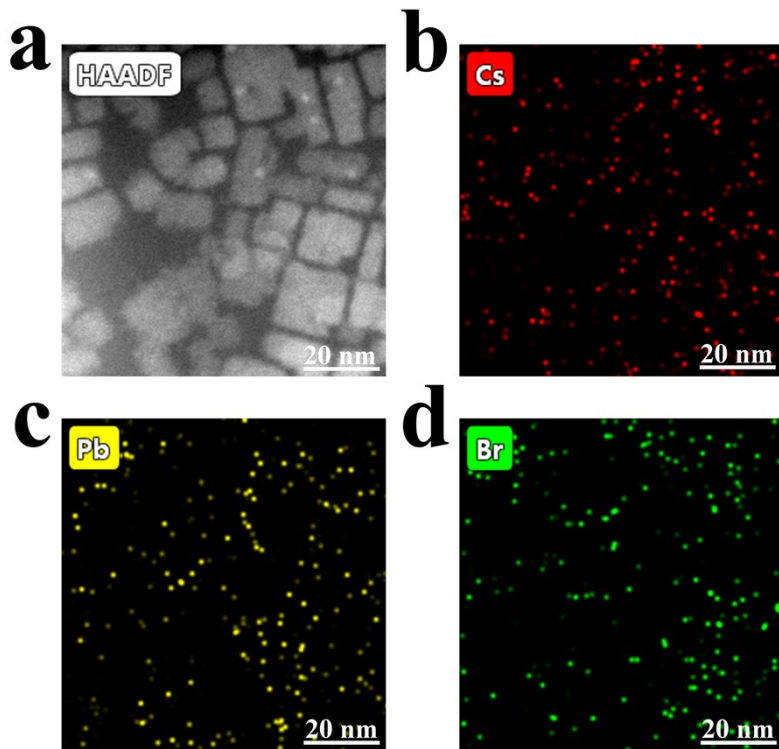

Figure S1. The EDS mapping for pure CsPbBr<sub>3</sub> QDs.

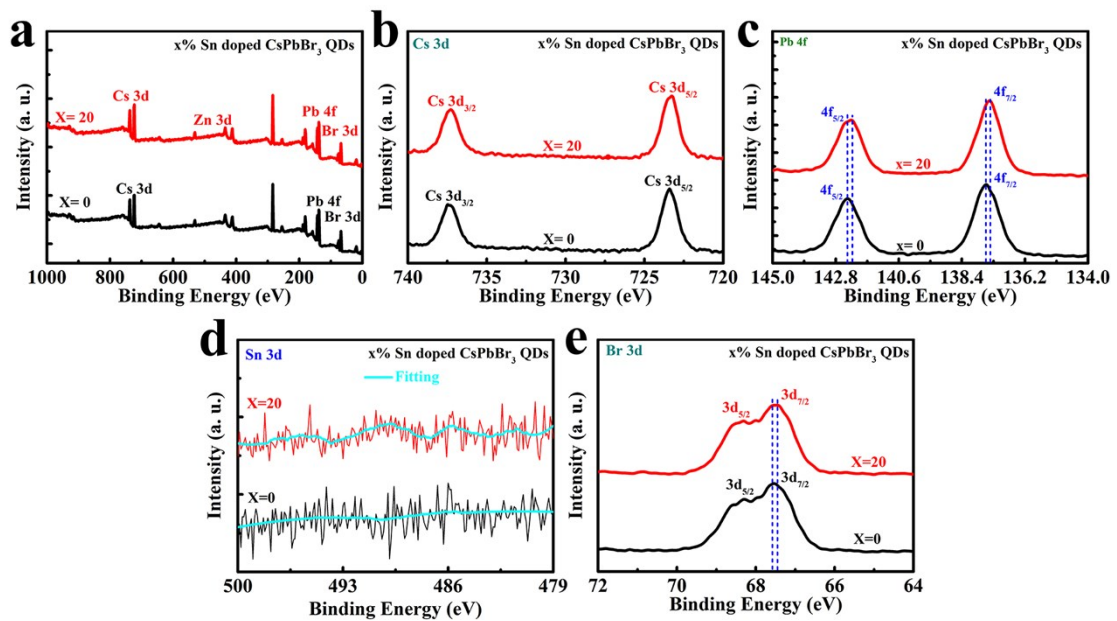

Figure S2. (a) XPS survey for pure and 20% Sn<sup>2+</sup> doped CsPbBr<sub>3</sub> QDs (b~e) High resolution XPS spectrum of Cs 3d, Pb 4f, Sn 3d and Br 3d for pure and 20% Sn<sup>2+</sup> doped CsPbBr<sub>3</sub> QDs, respectively.

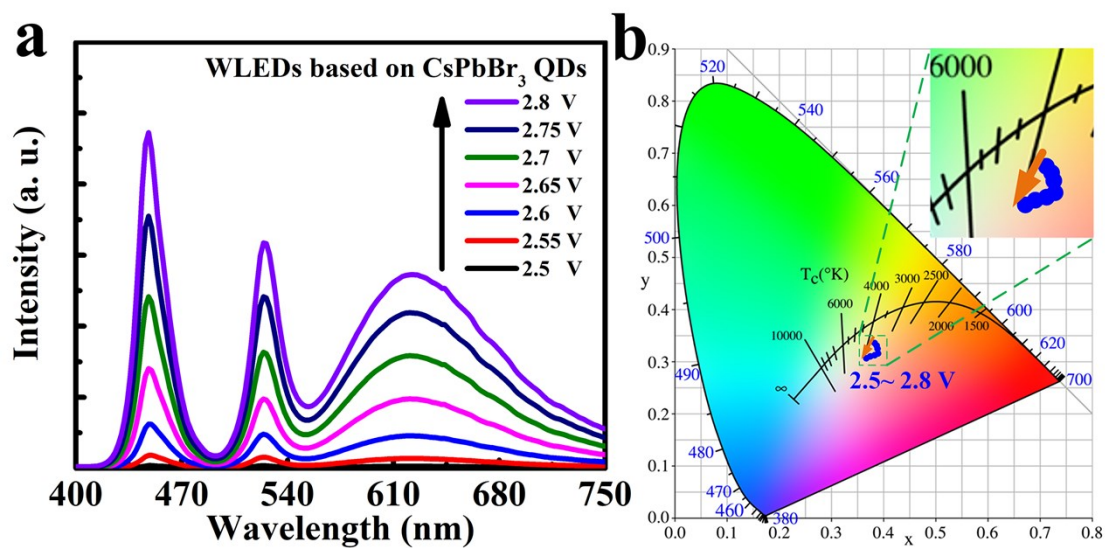

Figure S3. (a) EL spectra and (b) CIE color coordinates of pure CsPbBr<sub>3</sub> QDs-based WLEDs.

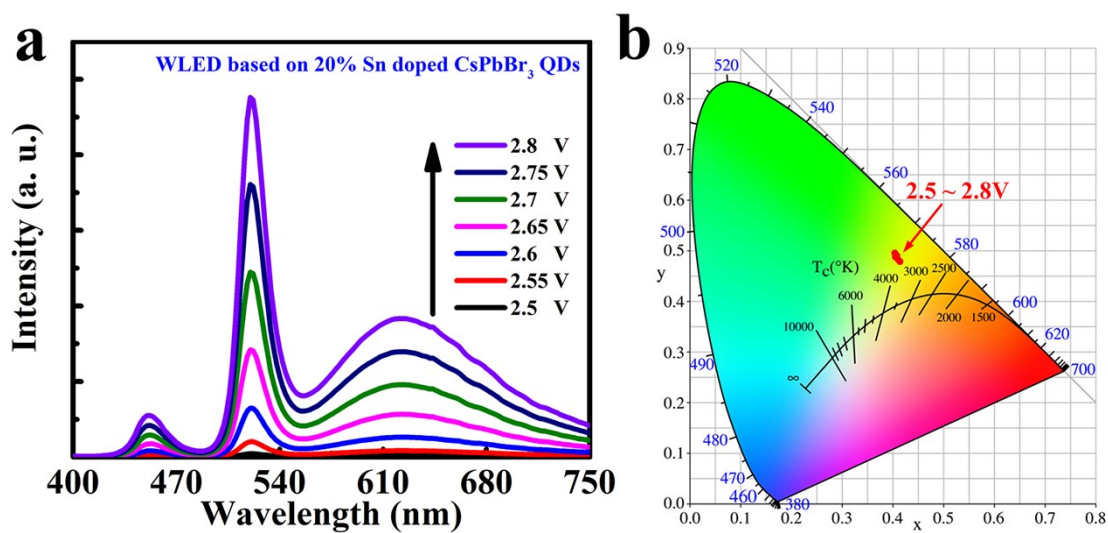

Figure S4 (a) EL spectra and (b) CIE color coordinates of 20% Sn<sup>2+</sup> doped CsPbBr<sub>3</sub> QDs WLEDs.
